# Supplementary material for: In situ photodeposition of MoSx on CdS nanorods as a highly efficient cocatalyst for photocatalytic hydrogen production
Source: Royal Society of Chemistry journal article supplement (doi:10.1039/c7ta04814a), 2017-01-01
Supplement: c7ta04814a1.pdf [file c7ta04814a1.pdf]

***In situ* photodeposition of MoS<sub>2</sub> on CdS nanorods as a highly efficient cocatalyst for photocatalytic hydrogen production**

Xianliang Fu<sup>a\*</sup>, Li Zhang<sup>a</sup>, Lihua Liu<sup>a</sup>, Hui Li<sup>a</sup>, Sugang Meng<sup>a</sup>, Xiangju Ye<sup>b</sup>, Shifu Chen<sup>a,b\*</sup>

<sup>a</sup> College of Chemistry and Material Science, Huaibei Normal University, Huaibei, Anhui, 235000, China.

<sup>b</sup> Department of Chemistry, Anhui Science and Technology University, Fengyang, Anhui, 233100 China.

**Electronic Supplementary Information (ESI)**

**Fig. S1** (a) XRD and (b) FT-IR spectrum of the prepared ATTM.

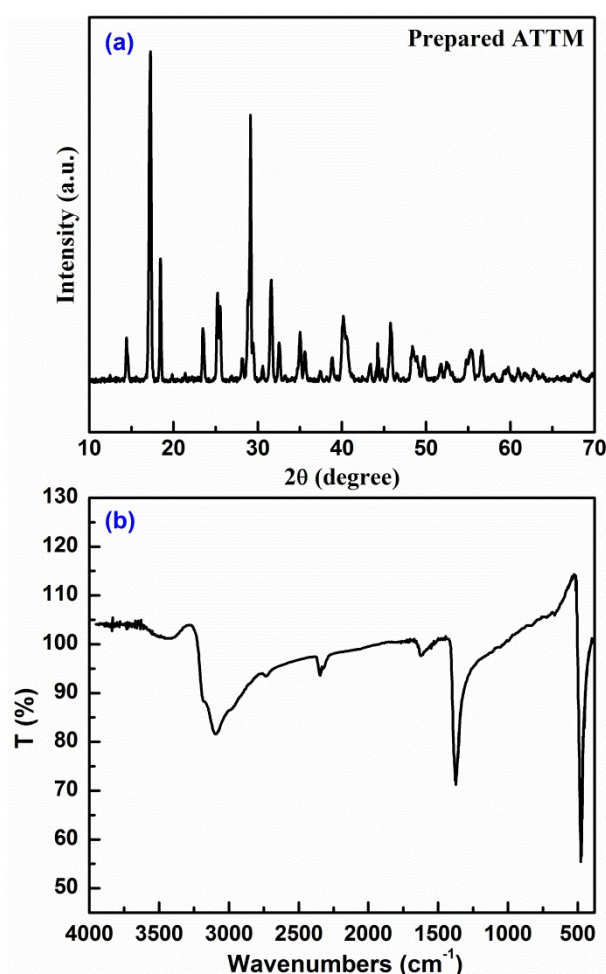

The XRD result (Fig. S1a) indicated that the prepared ATTM is in a highly crystalline orthorhombic structure and the diffraction peaks can be indexed to standard (NH<sub>4</sub>)<sub>2</sub>MoS<sub>4</sub> (ICDD-JCPDS Card No. 48-1662).

The FTIR spectrum (Fig. S1b) is consistent with the reported (NH<sub>4</sub>)<sub>2</sub>MoS<sub>4</sub> reference spectrum<sup>1</sup> and the Mo-S stretching bands at 487 cm<sup>-1</sup> can be observed.

**Fig. S2** TEM and HRTEM image of Pt/CdS-N prepared by a photodeposition method.

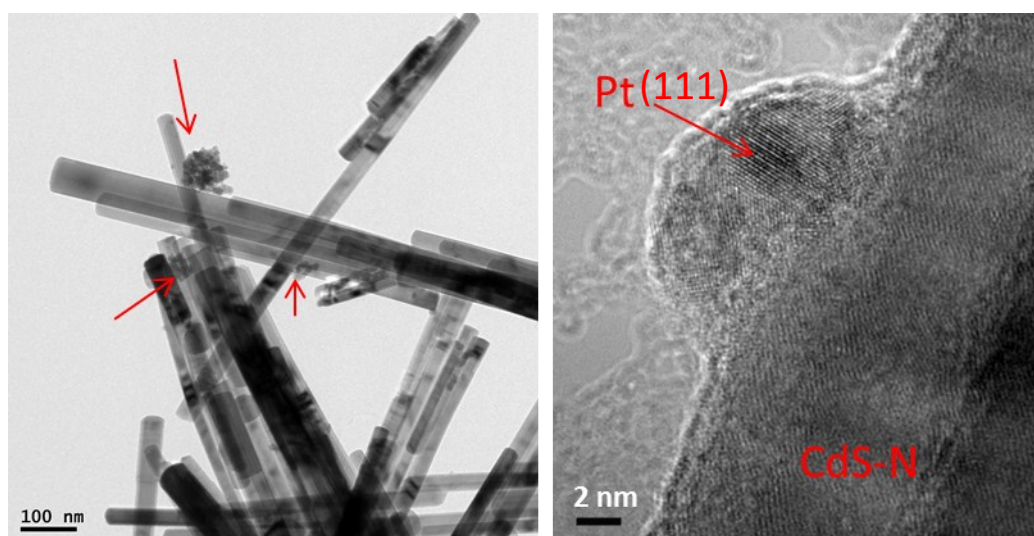

Photodeposition route has been extensively used for the loading of noble metal like Pt and Pd on photocatalyst since it reported in 1978.<sup>2</sup> The validity of this method has been fully confirmed by the reported works. The related works have been commented by a recent review paper.<sup>3</sup> Using this method for the deposition of Pt on CdS also has been reported.<sup>4</sup> Thus, theoretically, we believe that Pt can be loaded on CdS-N by photodeposition route. Here, the TEM and HRTEM images of Pt modified CdS-N were measured. Some Pt particles can be identified as denoted by the arrows.

The actual Pt loading amount was determined to be 0.13% by ICP (Fig. S3). At last, compared with pristine CdS-N, the improved HER activity for the Pt/CdS-N also suggests the loading of Pt on CdS-N. Therefore, the experimental results also confirmed that Pt can be loaded on CdS-N by photodeposition route.

**Fig. S3** the characteristic ICP emission line (265.9 nm) of Pt element.

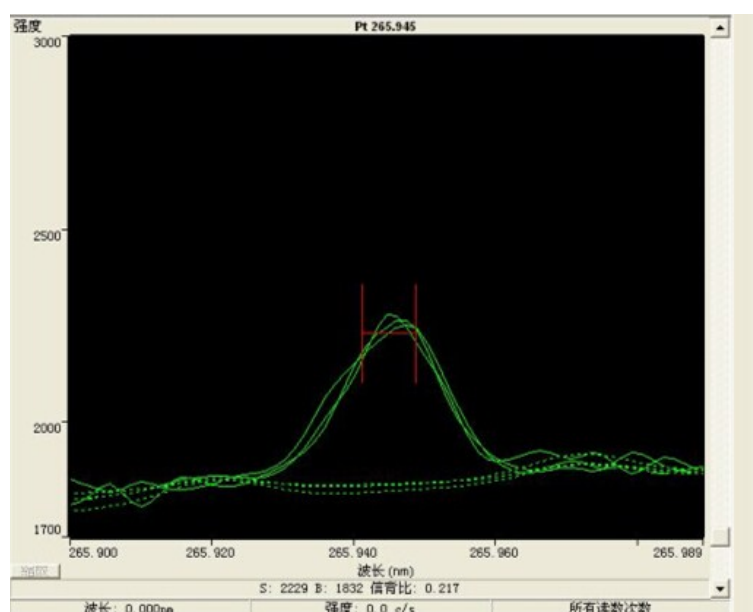

**Fig. S4** Cycling photocatalytic HER over pristine CdS-N under visible light irradiation for 2 runs.

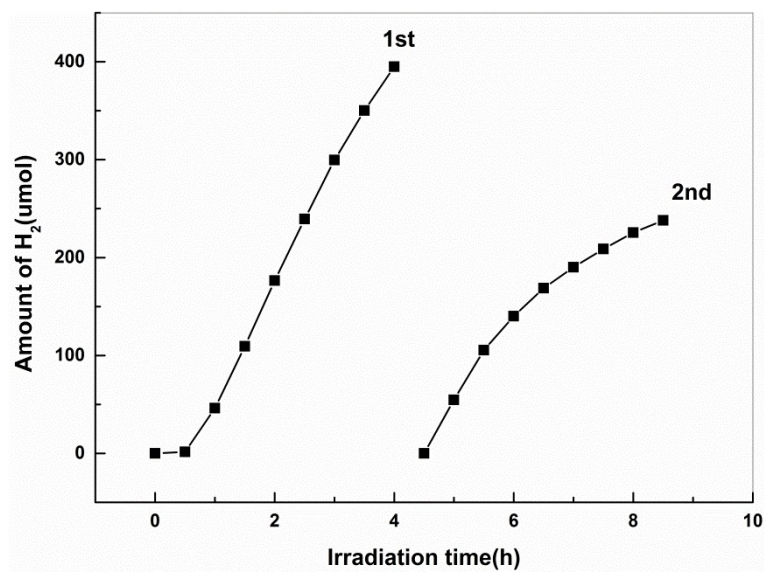

## References

- (1) Y. Yi, X. Jin, L. Wang, Q. Zhang, G. Xiong, C. Liang. *Catal. Today*, 2011, **175**, 460.
- (2) B. Kraeutler, A. J. Bard. *J. AM. CHEM. SOC.*, 1978, **100**, 4317.
- (3) K. Wenderich, G. Mul. *Chem. Rev.*, 2016, **116**, 14587.
- (4) G. Dukovic, M. G. Merkle, J. H. Nelson, S. M. Hughes, A. P. Alivisatos. *Adv Mater*, 2008, **20**, 4306.
